# Supplementary material
Source: publisher figshare collection journal article supplement (https://gsajournals.figshare.com/ndownloader/files/26826992)
Supplement: Supplementary file 1 [file 26826992]

## Sheet: junbb_1
Supplemental Table 5 - NGS reads and read counts for junbb_1
WT reference sequence:
CTCGGACGGTTTTACAGGTGGACACAGAACTGTCAGGCTCGCCAGCTGAACCACCGGTTTTCCAACTCTATGAGTACAAAAATGGAGCAGCCGTTTTACCACGACGACTCGTTTCTGTTGGGTTACGGTCACAACGACGCGGCTCTACACGACTACAAACTCCAGAAACCGGGCATGAACTTAAACGTGACCGAGCCGCCCTATCGGAGCCTCAAATCGG , WT
Sequence									Read Count	Read %
INJECTED #1
CTCGGACGGTTTTACAGGTGGACACAGAACTGTCAGGCTCGCCAGCTGAACCACCGGTTTTCCAACTCTATGAGTACAAAAATGGAGCAGCCGTTTTACCACGACGACTCGTTTCTGTTGGGTTACGGTCACAACGACGCGGCTCTACACGACTACAAACTCCAGAAACCGGGCATGAACTTAAACGTGACCGAGCCGCCCTATCGGAGCCTCAAATCGG , WT									184	7.10425
CTCGGACGGTTTTACAGGTGGACACAGAACTGTCAGGCTCGCCAGCTGAACCACCGGTTTTCCAACTCTATGAGTACAAAAATGGAGCAGCCGTTTTACCACGACGACTCGTTTCTGTTGGGTTACGGTCACAACGGCTCTACACGACTACAAACTCCAGAAACCGGGCATGAACTTAAACGTGACCGAGCCGCCCTATCGGAGCCTCAAATCGG , 542									542	20.9266
CTCGGACGGTTTTACAGGTGGACGCTGAACTGTCAGGCTCGCCAGCTGAACCACCGGTTTTCAAACTCTATGAGTACAAAAATGGAGCAGCCGTTTTACCACGACGACTCGTTTCTGTTGGGTTACGGTCACAACGCGGCTCTACACGACTACAAACTCCAGAAACCGGGCATGAACTTGAACGTGACCGAGCCGCCCTATCGGAGCCTCAAATCGG , 442									442	17.0656
CTCGGACGGTTTTACAGGTGGACACAGAACTGTCAGGCTCGCCAGCTGAACCACCGGTTTTCCAACTCTATGAGTACAAAAATGGAGCAGCCGTTTTACCACGACGACTCGTTTCTGTTGGGTTACGGTCACAACGCGGCTCTACACGACTACAAACTCCAGAAACCGGGCATGAACTTAAACGTGACCGAGCCGCCCTATCGGAGCCTCAAATCGG , 395									395	15.251
CTCGGACGGTTTTACAGGTGGACACAGAACTGTCAGGCTCGCCAGCTGAACCACCGGTTTTCCAACTCTATGAGTACAAAAATGGAGCAGCCGTTTTACCACGACGACTCGTTTCTGTTGGGTTACGGTCACGCGGCTCTACACGACTACAAACTCCAGAAACCGGGCATGAACTTAAACGTGACCGAGCCGCCCTATCGGAGCCTCAAATCGG , 220									220	8.49421
CTCGGACGGTTTTACAGGTGGACGCTGAACTGTCAGGCTCGCCAGCTGAACCACCGGTTTTCAAACTCTATGAGTACAAAAATGGAGCAGCCGTTTTACCACGACGACTCGTTTCTGTTGGGTTACGGTCACGCGGCTCTACACGACTACAAACTCCAGAAACCGGGCATGAACTTGAACGTGACCGAGCCGCCCTATCGGAGCCTCAAATCGG , 150									150	5.79151
CTCGGACGGTTTTACAGGTGGACGCTGAACTGTCAGGCTCGCCAGCTGAACCACCGGTTTTCAAACTCTATGAGTACAAAAATGGAGCAGCCGTTTTACCACGACGACTCGTTTCTGTTGGGTTACGCGGCTCTACACGACTACAAACTCCAGAAACCGGGCATGAACTTGAACGTGACCGAGCCGCCCTATCGGAGCCTCAAATCGG , 146									146	5.63707
CTCGGACGGTTTTACAGGTGGACGCTGAACTGTCAGGCTCGCCAGCTGAACCACCGGTTTTCAAACTCTATGAGTACAAAAATGGAGCAGCCGTTTTACCACGACGACTCGTTTCTGCGGCTCTACACGACTACAAACTCCAGAAACCGGGCATGAACTTGAACGTGACCGAGCCGCCCTATCGGAGCCTCAAATCGG , 109									109	4.20849
CTCGGACGGTTTTACAGGTGGACGCTGAACTGTCAGGCTCGCCAGCTGAACCACCGGTTTTCAAACTCTATGAGTACAAAAATGGAGCAGCCGTTTTACCACGACGACTCGTTTCTGTTGGGTTACGGTCACAACGACGCGGCTCTACACGACTACAAACTCCAGAAACCGGGCATGAACTTGAACGTGACCGAGCCGCCCTATCGGAGCCTCAAATCGG , 92									92	3.55212
CTCGGACGGTTTTACAGGTGGACACAGAACTGTCAGGCTCGCCAGCTGAACCACCGGTTTTCCAACTCTATGAGTACAAAAATGGAGCAGCCGTTTTACCACGACGACTCGTTTCTGTTGGGTTACGCGGCTCTACACGACTACAAACTCCAGAAACCGGGCATGAACTTAAACGTGACCGAGCCGCCCTATCGGAGCCTCAAATCGG , 91									91	3.51351
CTCGGACGGTTTTACAGGTGGACGCTGAACTGTCAGGCTCGCCAGCTGAACCACCGGTTTTCAAACTCTATGAGTACAAAAATGGAGCAGCCGTTTTACCACGACGACTCGTTTCTGTTGGGTTACGGCTCTACACGACTACAAACTCCAGAAACCGGGCATGAACTTGAACGTGACCGAGCCGCCCTATCGGAGCCTCAAATCGG , 89									89	3.43629
CTCGGACGGTTTTACAGGTGGACGCTGAACTGTCAGGCTCGCCAGCTGAACCACCGGTTTTCAAACTCTATGAGTACAAAAATGGAGCAGCCGTTTTACCACGACGACTCGTTTCTGTTGGGTTACGGTCACAACTCGGTCTACAAACTCCAGAAACCGGGCATGAACTTGAACGTGACCGAGCCGCCCTATCGGAGCCTCAAATCGG , 66									66	2.54826
CTCGGACGGTTTTACAGGTGGACACAGAACTGTCAGGCTCGCCAGCTGAACCACCGGTTTTCCAACTCTATGAGTACAAAAATGGAGCAGCCGTTTTACCACGACGACTCGTTTCTGTTGGGTTACGGTCACAACGACGCGGCTCTACACGACTACAAACTCCAGAAACCGGGCATGAACTTAAACGTGACCGAGCCGCCCTATCGGAGCCTCAAATCGG , 64									64	2.47104
INJECTED #2
CTCGGACGGTTTTACAGGTGGACACAGAACTGTCAGGCTCGCCAGCTGAACCACCGGTTTTCCAACTCTATGAGTACAAAAATGGAGCAGCCGTTTTACCACGACGACTCGTTTCTGTTGGGTTACGGTCACAACGACGCGGCTCTACACGACTACAAACTCCAGAAACCGGGCATGAACTTAAACGTGACCGAGCCGCCCTATCGGAGCCTCAAATCGG , WT									1	0.0333667
CTCGGACGGTTTTACAGGTGGACACAGAACTGTCAGGCTCGCCAGCTGAACCACCGGTTTTCCAACTCTATGAGTACAAAAATGGAGCAGCCGTTTTACCACGACGACTCGTTTCTGTTGGGTTACGGTCACAACGCGGCTCTACACGACTACAAACTCCAGAAACCGGGCATGAACTTAAACGTGACCGAGCCGCCCTATCGGAGCCTCAAATCGG , 632									632	21.0878
CTCGGACGGTTTTACAGGTGGACACCGAACTGTCAGGCTCGCCAGCTGAACCACCGGTTTTCCAACTCTATGAGTACAAAAATGGAGCAGCCGTTTTACCACGACGACTCGTTTCTGTTGGGTTACGGTCACAACGGTCACTCGTGACCGAGCCGCCCTATCGGAACCTCAAATCGG , 469									469	15.649
CTCGGACGGTTTTACAGGTGGACACCGAACTGTCAGGCTCGCCAGCTGAACCACCGGTTTTCCAACTCTATGAGTACAAAAATGGAGCAGCCGTTTTACCACGACGACTCGTTTCTGTTGGGTTACGGCTCTACACGACTACAAACTCCAGAAACCGGGCATGAACTTGAACGTGACCGAGCCGCCCTATCGGAACCTCAAATCGG , 381									381	12.7127
CTCGGACGGTTTTACAGGTGGACACCGAACTGTCAGGCTCGCCAGCTGAACCACCGGTTTTCCAACTCTATGAGTACAAAAATGGAGCAGCCGTTTTACCACGACGACTCGTTTCTGTTGGGTTACGCGGCTCTACACGACTACAAACTCCAGAAACCGGGCATGAACTTGAACGTGACCGAGCCGCCCTATCGGAACCTCAAATCGG , 309									309	10.3103
CTCGGACGGTTTTACAGGTGGACACCGAACTGTCAGGCTCGCCAGCTGAACCACCGGTTTTCCAACTCTATGAGTACAAAAATGGAGCAGCCGTTTTACCACGACGACTCGTTTCTGTTGGGTTACGGTCACAACGCGGCTCTACACGACTACAAACTCCAGAAACCGGGCATGAACTTGAACGTGACCGAGCCGCCCTATCGGAACCTCAAATCGG , 266									266	8.87554
CTCGGACGGTTTTACAGGTGGACACAGAACTGTCAGGCTCGCCAGCTGAACCACCGGTTTTCCAACTCTATGAGTACAAAAATGGAGCAGCCGTTTTACCACGACGACTCGTTTCTGTTGGGTTACGGTCAGCCGTAACCCAACAGCGGCTCTACACGACTACAAACTCCAGAAACCGGGCATGAACTTAAACGTGACCGAGCCGCCCTATCGGAGCCTCAAATCGG , 173									173	5.77244
CTCGGACGGTTTTACAGGTGGACACAGAACTGTCAGGCTCGCCAGCTGAACCACCGGTTTTCCAACTCTATGAGTACAAAAATGGAGCAGCCGTTTTACCACGACGACTCGTTTCTGTTGGGTTACGGTCACAACCCGCGGCTCTACACGACTACAAACTCCAGAAACCGGGCATGAACTTAAACGTGACCGAGCCGCCCTATCGGAGCCTCAAATCGG , 166									166	5.53887
CTCGGACGGTTTTACAGGTGGACACAGAACTGTCAGGCTCGCCAGCTGAACCACCGGTTTTCCAACTCTATGAGTACAAAAATGGAGCAGCCGTTTTACCACGACGACTCGTTTCTGTTGGGTTACGGTCACGCGGCTCTACACGACTACAAACTCCAGAAACCGGGCATGAACTTAAACGTGACCGAGCCGCCCTATCGGAGCCTCAAATCGG , 148									148	4.93827
CTCGGACGGTTTTACAGGTGGACGCTGAACTGTCAGGCTCGCCAGCTGAACCACCGGTTTTCAAACTCTATGAGTACAAAAATGGAGCAGCCGTTTTACCACGACGACTCGTTTCTGTTGGGTTACGGACGCGGCTCTACACGACTACAAACTCCAGAAACCGGGCATGAACTTGAACGTGACCGAGCCGCCCTATCGGAGCCTCAAATCGG , 139									139	4.63797
CTCGGACGGTTTTACAGGTGGACACAGAACTGTCAGGCTCGCCAGCTGAACCACCGGTTTTCCAACTCTATGAGTACAAAAATGGAGCAGCCGTTTTACCACGACGACTCGTTTCTGTTGGGTTACGGTCACAACGCATCTACACGACTACAAACTCCAGAAACCGGGCATGAACTTAAACGTGACCGAGCCGCCCTATCGGAGCCTCAAATCGG , 130									130	4.33767
CTCGGACGGTTTTACAGGTGGACGCTGAACTGTCAGGCTCGCCAGCTGAACCACCGGTTTTCAAACTCTATGAGTACAAAAATGGAGCAGCCGTTTTACCACGACGACTCGTTTCTGTTGGGTTACGGTCACGCGGCTCTACACGACTACAAACTCCAGAAACCGGGCATGAACTTGAACGTGACCGAGCCGCCCTATCGGAGCCTCAAATCGG , 104									104	3.47014
CTCGGACGGTTTTACAGGTGGACGCTGAACTGTCAGGCTCGCCAGCTGAACCACCGGTTTTCAAACTCTATGAGTACAAAAATGGAGCAGCCGTTTTACCACGACGACTCGTTTCTGTCTCGTTTCGACGACTCGCGGCTCTACACGACTACAAACTCCAGAAACCGGGCATGAACTTGAACGTGACCGAGCCGCCCTATCGGAGCCTCAAATCGG , 79									79	2.63597
INJECTED #3
CTCGGACGGTTTTACAGGTGGACACAGAACTGTCAGGCTCGCCAGCTGAACCACCGGTTTTCCAACTCTATGAGTACAAAAATGGAGCAGCCGTTTTACCACGACGACTCGTTTCTGTTGGGTTACGGTCACAACGACGCGGCTCTACACGACTACAAACTCCAGAAACCGGGCATGAACTTAAACGTGACCGAGCCGCCCTATCGGAGCCTCAAATCGG , WT									39	1.45849
CTCGGACGGTTTTACAGGTGGACACAGAACTGTCAGGCTCGCCAGCTGAACCACCGGTTTTCCAACTCTATGAGTACAAAAATGGAGCAGCCGTTTTACCACGACGACTCGTTTCTGTTGGGTTACGGTCACAACGCGGCTCTACACGACTACAAACTCCAGAAACCGGGCATGAACTTAAACGTGACCGAGCCGCCCTATCGGAGCCTCAAATCGG , 706									706	26.4024
CTCGGACGGTTTTACAGGTGGACACCGAACTGTCAGGCTCGCCAGCTGAACCACCGGTTTTCCAACTCTATGAGTACAAAAATGGAGCAGCCGTTTTACCACGACGACTCGTTTCTGTTGGGTTACGGTCACAACGCGGCTCTACACGACTACAAACTCCAGAAACCGGGCATGAACTTGAACGTGACCGAGCCGCCCTATCGGAACCTCAAATCGG , 350									350	13.089
CTCGGACGGTTTTACAGGTGGACACAGAACTGTCAGGCTCGCCAGCTGAACCACCGGTTTTCCAACTCTATGAGTACAAAAATGGAGCAGCCGTTTTACCACGACGACTCGTTTCTGTTGGGTTACGGTCACGCGGCTCTACACGACTACAAACTCCAGAAACCGGGCATGAACTTAAACGTGACCGAGCCGCCCTATCGGAGCCTCAAATCGG , 297									297	11.107
CTCGGACGGTTTTACAGGTGGACACAGAACTGTCAGGCTCGCCAGCTGAACCACCGGTTTTCCAACTCTATGAGTACAAAAATGGAGCAGCCGTTTTACCACGACGACTCGTTTCTGTTGGGTTACGGTCACTTACACGACTACAAACTCCAGAAACCGGGCATGAACTTAAACGTGACCGAGCCGCCCTATCGGAGCCTCAAATCGG , 248									248	9.2745
CTCGGACGGTTTTACAGGTGGACACCGAACTGTCAGGCTCGCCAGCTGAACCACCGGTTTTCCAACTCTATGAGTACAAAAATGGAGCAGCCGTTTTACCACGACGACTCGTTTCTGTTGGGTTACGGTCACGTTCAAGGCTCTACACGACTACAAACTCCAGAAACCGGGCATGAACTTGAACGTGACCGAGCCGCCCTATCGGAACCTCAAATCGG , 212									212	7.9282
CTCGGACGGTTTTACAGGTGGACACAGAACTGTCAGGCTCGCCAGCTGAACCACCGGTTTTCCAACTCTATGAGTACAAAAATGGAGCAGCCGTTTTACCACGACGACTCGTTTCTGTTGGGTTACGGTCACAACGGCTCTACACGACTACAAACTCCAGAAACCGGGCATGAACTTAAACGTGACTCCAGAAACCGGGCATGAACTTAAACGTGACCGAGCCGCCCTATCGGAGCCTCAAATCGG , 178									178	6.65669
CTCGGACGGTTTTACAGGTGGACACCGAACTGTCAGGCTCGCCAGCTGAACCACCGGTTTTCCAACTCTATGAGTACAAAAATGGAGCAGCCGTTTTACCACGACGACTCGTTTCTGTTGGGTTACGGTCACGCGGCTCTACACGACTACAAACTCCAGAAACCGGGCATGAACTTGAACGTGACCGAGCCGCCCTATCGGAACCTCAAATCGG , 147									147	5.49738
CTCGGACGGTTTTACAGGTGGACACAGAACTGTCAGGCTCGCCAGCTGAACCACCGGTTTTCCAACTCTATGAGTACAAAAATGGAGCAGCCGTTTTACCACGACGACTCGTTTCTGTTGGGTTACGGTCACGGCTCTACACGACTACAAACTCCAGAAACCGGGCATGAACTTAAACGTGACCGAGCCGCCCTATCGGAGCCTCAAATCGG , 138									138	5.16081
CTCGGACGGTTTTACAGGTGGACACAGAACTGTCAGGCTCGCCAGCTGAACCACCGGTTTTCCAACTCTATGAGTACAAAAATGGAGCAGCCGTTTTACCACGACGACTCGTTTCTGTTGGGTTACGCGGCTCTACACGACTACAAACTCCAGAAACCGGGCATGAACTTAAACGTGACCGAGCCGCCCTATCGGAGCCTCAAATCGG , 113									113	4.22588
CTCGGACGGTTTTACAGGTGGACACAGAACTGTCAGGCTCGCCAGCTGAACCACCGGTTTTCCAACTCTATGAGTACAAAAATGGAGCAGCCGTTTTACCACGACGACTCGTTTCTGTTGGGTTACGGTCACGGTTACGCGGCTCTACACGACTACAAACTCCAGAAACCGGGCATGAACTTAAACGTGACCGAGCCGCCCTATCGGAGCCTCAAATCGG , 99									99	3.70232
CTCGGACGGTTTTACAGGTGGACACAGAACTGTCAGGCTCGCCAGCTGAACCACCGGTTTTCCAACTCTATGAGTACAAAAATGGAGCAGCCGTTTTACCACGACGACTCGTTTCTGTTGGGTTACGGTCACAACCGGGCATGAACTTAAACGTGACCGAGCCGCCCTATCGGAGCCTCAAATCGG , 79									79	2.95438
CTCGGACGGTTTTACAGGTGGACACAGAACTGTCAGGCTCGCCAGCTGAACCACCGGTTTTCCAACTCTATGAGTACAAAAATGGAGCAGCCGTTTTACCACGACGACTCGTTTCTGTTGGGTTACGGTCACAACTTAAACGTGACCGAGCCGCCCTATCGGAGCCTCAAATCGG , 68									68	2.54301
INJECTED #4
CTCGGACGGTTTTACAGGTGGACACAGAACTGTCAGGCTCGCCAGCTGAACCACCGGTTTTCCAACTCTATGAGTACAAAAATGGAGCAGCCGTTTTACCACGACGACTCGTTTCTGTTGGGTTACGGTCACAACGACGCGGCTCTACACGACTACAAACTCCAGAAACCGGGCATGAACTTAAACGTGACCGAGCCGCCCTATCGGAGCCTCAAATCGG , WT									16	0.496278
CTCGGACGGTTTTACAGGTGGACGCTGAACTGTCAGGCTCGCCAGCTGAACCACCGGTTTTCAAACTCTATGAGTACAAAAATGGAGCAGCCGTTTTACCACGACGACTCGTTTCTGTTGGGTTACGGTCACAACGAGCGGTTCACCGCTGCGCTACTCGGCTCTACACGACTACAAACTCCAGAAACCGGGCATGAACTTGAACGTGACCGAGCCGCCCTATCGGAGCCTCAAATCGG , 541									541	16.7804
CTCGGACGGTTTTACAGGTGGACACAGAACTGTCAGGCTCGCCAGCTGAACCACCGGTTTTCCAACTCTATGAGTACAAAAATGGAGCAGCCGTTTTACCACGACGACTCGTTTCTGTTGGGTTACGGTCACGCGGCTCTACACGACTACAAACTCCAGAAACCGGGCATGAACTTAAACGTGACCGAGCCGCCCTATCGGAGCCTCAAATCGG , 491									491	15.2295
CTCGGACGGTTTTACAGGTGGACACAGAACTGTCAGGCTCGCCAGCTGAACCACCGGTTTTCCAACTCTATGAGTACAAAAATGGAGCAGCCGTTTTACCACGACGACTCGTTTCTGTTGGGTTACGGTCACAACGGTCACGCGGCTCTACACGACTACAAACTCCAGAAACCGGGCATGAACTTAAACGTGACCGAGCCGCCCTATCGGAGCCTCAAATCGG , 415									415	12.8722
CTCGGACGGTTTTACAGGTGGACACAGAACTGTCAGGCTCGCCAGCTGAACCACCGGTTTTCCAACTCTATGAGTACAAAAATGGAGCAGCCGTTTTACCACGACGACTCGTTTCTGTTGGGTTACGCGGCTCTACACGACTACAAACTCCAGAAACCGGGCATGAACTTAAACGTGACCGAGCCGCCCTATCGGAGCCTCAAATCGG , 364									364	11.2903
CTCGGACGGTTTTACAGGTGGACGCTGAACTGTCAGGCTCGCCAGCTGAACCACCGGTTTTCAAACTCTATGAGTACAAAAATGGAGCAGCCGTTTTACCACGACGACTCGTTTCTGTTGGGTTACGGTCACACGACTACAAACTCCAGAAACCGGGCATGAACTTGAACGTGACCGAGCCGCCCTATCGGAGCCTCAAATCGG , 327									327	10.1427
CTCGGACGGTTTTACAGGTGGACGCTGAACTGTCAGGCTCGCCAGCTGAACCACCGGTTTTCAAACTCTATGAGTACAAAAATGGAGCAGCCGTTTTACCACGACGACTCGTTTCTGTTGGGTTACGGTCACAACGCGGCTCTACACGACTACAAACTCCAGAAACCGGGCATGAACTTGAACGTGACCGAGCCGCCCTATCGGAGCCTCAAATCGG , 274									274	8.49876
CTCGGACGGTTTTACAGGTGGACACAGAACTGTCAGGCTCGCCAGCTGAACCACCGGTTTTCCAACTCTATGAGTACAAAAATGGAGCAGCCGTTTTACCACGACGACTCGTTTCTGTTGGGTTACGGTCACAACGCGGCTCTACACGACTACAAACTCCAGAAACCGGGCATGAACTTAAACGTGACCGAGCCGCCCTATCGGAGCCTCAAATCGG , 261									261	8.09553
CTCGGACGGTTTTACAGGTGGACGCTGAACTGTCAGGCTCGCCAGCTGAACCACCGGTTTTCAAACTCTATGAGTACAAAAATGGAGCAGCCGTTTTACCACGACGACTCGTTTCTGTTGGGTTACGGTCGCGGCTCTACACGACTACAAACTCCAGAAACCGGGCATGAACTTGAACGTGACCGAGCCGCCCTATCGGAGCCTCAAATCGG , 179									179	5.55211
CTCGGACGGTTTTACAGGTGGACGCTGAACTGTCAGGCTCGCCAGCTGAACCACCGGTTTTCAAACTCTATGAGTACAAAAATGGAGCAGCCGTTTTACCACGACGACTCGTTTCTGTTGGGTTACGGTCACGCGGCTCTACACGACTACAAACTCCAGAAACCGGGCATGAACTTGAACGTGACCGAGCCGCCCTATCGGAGCCTCAAATCGG , 100									100	3.10174
CTCGGACGGTTTTACAGGTGGACACAGAACTGTCAGGCTCGCCAGCTGAACCACCGGTTTTCCAACTCTATGAGTACAAAAATGGAGCAGCCGTTTTACCACGACGACTCGTTTCTGTTGGGTTCTGTTGGGTTCTACGCGGCTCTACACGACTACAAACTCCAGAAACCGGGCATGAACTTAAACGTGACCGAGCCGCCCTATCGGAGCCTCAAATCGG , 96									96	2.97767
CTCGGACGGTTTTACAGGTGGACGCTGAACTGTCAGGCTCGCCAGCTGAACCACCGGTTTTCAAACTCTATGAGTACAAAAATGGAGCAGCCGTTTTACCACGACGACTCGTTTCTGTTGGGTTACGGTCACAACGGACGCGGCTCTACACGACTACAAACTCCAGAAACCGGGCATGAACTTGAACGTGACCGAGCCGCCCTATCGGAGCCTCAAATCGG , 95									95	2.94665
CTCGGACGGTTTTACAGGTGGACACAGAACTGTCAGGCTCGCCAGCTGAACCACCGGTTTTCCAACTCTATGAGTACAAAAATGGAGCAGCCGTTTTACCACGACGACTCCTTTCTGTTGGGTTACGGCTCTACACGACTACAAACTCCAGAAACCGGGCATGAACTTAAACGTGACCGAGCCGCCCTATCGGAGCCTCAAATCGG , 65									65	2.01613
INJECTED #5
CTCGGACGGTTTTACAGGTGGACACAGAACTGTCAGGCTCGCCAGCTGAACCACCGGTTTTCCAACTCTATGAGTACAAAAATGGAGCAGCCGTTTTACCACGACGACTCGTTTCTGTTGGGTTACGGTCACAACGACGCGGCTCTACACGACTACAAACTCCAGAAACCGGGCATGAACTTAAACGTGACCGAGCCGCCCTATCGGAGCCTCAAATCGG , WT									2	0.049334
CTCGGACGGTTTTACAGGTGGACACCGAACTGTCAGGCTCGCCAGCTGAACCACCGGTTTTCCAACTCTATGAGTACAAAAATGGAGCAGCCGTTTTACCACGACGACTCGTTTCTGTTGGGTTACGCGGCTCTACACGACTACAAACTCCAGAAACCGGGCATGAACTTGAACGTGACCGAGCCGCCCTATCGGAACCTCAAATCGG , 1014									1014	25.0123
CTCGGACGGTTTTACAGGTGGACACCGAACTGTCAGGCTCGCCAGCTGAACCACCGGTTTTCCAACTCTATGAGTACAAAAATGGAGCAGCCGTTTTACCACGACGACTCGTTTCTGTTGGGTTACGGTCACAACGTAACTGATGGTGGTGGACGACTACACGACTACAAACTCCAGAAACCGGGCATGAACTTGAACGTGACCGAGCCGCCCTATCGGAACCTCAAATCGG , 945									946	23.335
CTCGGACGGTTTTACAGGTGGACACCGAACTGTCAGGCTCGCCAGCTGAACCACCGGTTTTCCAACTCTATGAGTACAAAAATGGAGCAGCCGTTTTACCACGACGACTCGTTTCTGTTGGGTTACGGTCACAACGCGGCTCTACACGACTACGCGGCTCTACACGACTACAAACTCCAGAAACCGGGCATGAACTTGAACGTGACCGAGCCGCCCTATCGGAACCTCAAATCGG , 446									446	11.0015
CTCGGACGGTTTTACAGGTGGACACCGAACTGTCAGGCTCGCCAGCTGAACCACCGGTTTTCCAACTCTATGAGTACAAAAATGGAGCAGCCGTTTTACCACGACGACTCGTTTCTGTTGGGTTACGGTCACAACAGAAACGCGGCTCTACACGACTACAAACTCCAGAAACCGGGCATGAACTTGAACGTGACCGAGCCGCCCTATCGGAACCTCAAATCGG , 291									291	7.1781
CTCGGACGGTTTTACAGGTGGACACCGAACTGTCAGGCTCGCCAGCTGAACCACCGGTTTTCCAACTCTATGAGTACAAAAATGGAGCAGCCGTTTTACCACGACGACTCGTTTCTGTCGGAACCTCAAATCGG , 270									270	6.66009
CTCGGACGGTTTTACAGGTGGACACCGAACTGTCAGGCTCGCCAGCTGAACCACCGGTTTTCCAACTCTATGAGTACAAAAATGGAGCAGCCGTTTTACCACGACGACTCGTTTCTGTTGGGTTACGGTCACAACAGACTTACGGTCAACACGACTACAAACTCCAGAAACCGGGCATGAACTTGAACGTGACCGAGCCGCCCTATCGGAACCTCAAATCGG , 228									228	5.62407
CTCGGACGGTTTTACAGGTGGACACCGAACTGTCAGGCTCGCCAGCTGAACCACCGGTTTTCCAACTCTATGAGTACAAAAATGGAGCAGCCGTTTTACCACGACTCGTTTCTGTTGGGTTACGGTCACAACACGCGGCTCTACACGACTACAAACTCCAGAAACCGGGCATGAACTTGAACGTGACCGAGCCGCCCTATCGGAACCTCAAATCGG , 219									219	5.40207
CTCGGACGGTTTTACAGGTGGACACCGAACTGTCAGGCTCGCCAGCTGAACCACCGGTTTTCCAACTCTATGAGTACAAAAATGGAGCAGCCGTTTTACCACGACGACTCGTTTCTGTTGGGTTACGGACTCGTTTCTGTTTGTAGTCGCGGCTCTACACGACTACAAACTCCAGAAACCGGGCATGAACTTGAACGTGACCGAGCCGCCCTATCGGAACCTCAAATCGG , 169									169	4.16872
CTCGGACGGTTTTACAGGTGGACACCGAACTGTCAGGCTCGCCAGCTGAACCACCGGTTTTCCAACTCTATGAGTACAAAAATGGAGCAGCCGTTTTACCACGACGACTCGTTTCTGTTGGGTTACGGTCACAACGCGGCTCTACACGACTACAAACTCCAGAAACCGGGCATGAACTTGAACGTGACCGAGCCGCCCTATCGGAACCTCAAATCGG , 145									145	3.57671
CTCGGACGGTTTTACAGGTGGACACCGAACTGTCAGGCTCGCCAGCTGAACCACCGGTTTTCCAACTCTATGAGTACAAAAATGGAGCAGCCGTTTTACCACGACGACTCGTTTCTGTTGGGTTACGGTCACAACGGCTCTACACGACTACAAACTCCAGAAACCGGGCATGAACTTGAACGTGACCGAGCCGCCCTATCGGAACCTCAAATCGG , 141									141	3.47805
CTCGGACGGTTTTACAGGTGGACACCGAACTGTCAGGCTCGCCAGCTGAACCACCGGTTTTCCAACTCTATGAGTACAAAAATGGAGCAGCCGTTTTACCACGACGACTCGTTTCTGTTGGGTTACGGTCACACACGACTACAAACTCCAGAAACCGGGCATGAACTTGAACGTGACCGAGCCGCCCTATCGGAACCTCAAATCGG , 111									111	2.73804
CTCGGACGGTTTTACAGGTGGACACCGAACTGTCAGGCTCGCCAGCTGAACCACCGGTTTTCCAACTCTATGAGTACAAAAATGGAGCAGCCGTTTTACCACGACGACTCGTTTCTGTTGGGTTACGGTCACGCGGCTCTACACGACTACAAACTCCAGAAACCGGGCATGAACTTGAACGTGACCGAGCCGCCCTATCGGAACCTCAAATCGG , 72									72	1.77602
INJECTED #6
CTCGGACGGTTTTACAGGTGGACACAGAACTGTCAGGCTCGCCAGCTGAACCACCGGTTTTCCAACTCTATGAGTACAAAAATGGAGCAGCCGTTTTACCACGACGACTCGTTTCTGTTGGGTTACGGTCACAACGACGCGGCTCTACACGACTACAAACTCCAGAAACCGGGCATGAACTTAAACGTGACCGAGCCGCCCTATCGGAGCCTCAAATCGG , WT									0	0
CTCGGACGGTTTTACAGGTGGACGCTGAACTGTCAGGCTCGCCAGCTGAACCACCGGTTTTCAAACTCTATGAGTACAAAAATGGAGCAGCCGTTTTACCACGACGACTCGTTTCTGTTGGGTTACGGTCACACGACTACGCGGCTCTACACGACTACAAACTCCAGAAACCGGGCATGAACTTGAACGTGACCGAGCCGCCCTATCGGAGCCTCAAATCGG , 851									851	26.1123
CTCGGACGGTTTTACAGGTGGACACAGAACTGTCAGGCTCGCCAGCTGAACCACCGGTTTTCCAACTCTATGAGTACAAAAATGGAGCAGCCGTTTTACCACGACGACTCGTTTCTGTTGGGTTACGGTCACAACACGCGGCTCTACACGACTACAAACTCCAGAAACCGGGCATGAACTTAAACGTGACCGAGCCGCCCTATCGGAGCCTCAAATCGG , 848									848	26.0203
CTCGGACGGTTTTACAGGTGGACGCTGAACTGTCAGGCTCGCCAGCTGAACCACCGGTTTTCAAACTCTATGAGTACAAAAATGGAGCAGCCGTTTTACCACGACGACTCGTTTCTGTTGGGTTACGGTCACAACTCTACACGACTACAAACTCCAGAAACCGGGCATGAACTTGAACGTGACCGAGCCGCCCTATCGGAGCCTCAAATCGG , 415									415	12.734
CTCGGACGGTTTTACAGGTGGACGCTGAACTGTCAGGCTCGCCAGCTGAACCACCGGTTTTCAAACTCTATGAGTACAAAAATGGAGCAGCCGTTTTACCACGACGACTCGTTTCTGTCGTTTCTGTTGTAGTCGCGGCTCTACACGACTACAAACTCCAGAAACCGGGCATGAACTTGAACGTGACCGAGCCGCCCTATCGGAGCCTCAAATCGG , 351									351	10.7702
CTCGGACGGTTTTACAGGTGGACGCTGAACTGTCAGGCTCGCCAGCTGAACCACCGGTTTTCAAACTCTATGAGTACAAAAATGGAGCAGCCGTTTTACCACGACGACTCGTTTCTGTTGGGTTACGGTCACGCGGCTCTACACGACTACAAACTCCAGAAACCGGGCATGAACTTGAACGTGACCGAGCCGCCCTATCGGAGCCTCAAATCGG , 290									290	8.89844
CTCGGACGGTTTTACAGGTGGACGCTGAACTGTCAGGCTCGCCAGCTGAACCACCGGTTTTCAAACTCTATGAGTACAAAAATGGAGCAGCCGTTTTACCACGACGACTCGTTTCTGTTGGGTTACGGTCACAACCGTAACCCAACGCGGCTCTACACGACTACAAACTCCAGAAACCGGGCATGAACTTGAACGTGACCGAGCCGCCCTATCGGAGCCTCAAATCGG , 116									116	3.55937
CTCGGACGGTTTTACAGGTGGACACAGAACTGTCAGGCTCGCCAGCTGAACCACCGGTTTTCCAACTCTATGAGTACAAAAATGGAGCAGCCGTTTTACCACGACGACTCGTTTCTGTTGGGTTACGGTCACGCGGCTCTACACGACTACAAACTCCAGAAACCGGGCATGAACTTAAACGTGACCGAGCCGCCCTATCGGAGCCTCAAATCGG , 103									103	3.16048
CTCGGACGGTTTTACAGGTGGACACAGAACTGTCAGGCTCGCCAGCTGAACCACCGGTTTTCCAACTCTATGAGTACAAAAATGGAGCAGCCGTTTTACCACGACGACTCGTTTCTGTTGGGTTACGGTCACAACGCGGCTCTACACGACTACAAACTCCAGAAACCGGGCATGAACTTAAACGTGACCGAGCCGCCCTATCGGAGCCTCAAATCGG , 67									67	2.05585
CTCGGACGGTTTTACAGGTGGACGCTGAACTGTCAGGCTCGCCAGCTGAACCACCGGTTTTCAAACTCTATGAGTACAAAAATGGAGCAGCCGTTTTACCACGACGACTCGTTTCTGTTGGGTTACGGTCACACGCGGCTCTACACGACTACAAACTCCAGAAACCGGGCATGAACTTGAACGTGACCGAGCCGCCCTATCGGAGCCTCAAATCGG , 66									66	2.02516
CTCGGACGGTTTTACAGGTGGACGCTGAACTGTCAGGCTCGCCAGCTGAACCACCGGTTTTCAAACTCTATGAGTACAAAAATGGAGCAGCCGTTTTACCACGACGACTCGTTTCTGTTGGGTTACGGTCACAACACGCGGCTCTACACGACTACAAACTCCAGAAACCGGGCATGAACTTAAACGTGACCGAGCCGCCCTATCGGAGCCTCAAATCGG , 58									58	1.77969
CTCGGACGGTTTTACAGGTGGACACAGAACTGTCAGGCTCGCCAGCTGAACCACCGGTTTTCCAACTCTATGAGTACAAAAATGGAGCAGCCGTTTTACCACGACGACTCGTTTCTGTTGGGTTACGGTCACACGACTACGCGGCTCTACACGACTACAAACTCCAGAAACCGGGCATGAACTTGAACGTGACCGAGCCGCCCTATCGGAGCCTCAAATCGG , 57									57	1.749
CTCGGACGGTTTTACAGGTGGACACAGAACTGTCAGGCTCGCCAGCTGAACCACCGGTTTTCCAACTCTATGAGTACAAAAATGGAGCAGCCGTTTTACCACGACGACTCGTTTCTGTTGGGTTACGGTTTTCTGTTGGGTTACGGTCACGGTCACGCGGCTCTACACGACTACAAACTCCAGAAACCGGGCATGAACTTAAACGTGACCGAGCCGCCCTATCGGAGCCTCAAATCGG , 37									37	1.13532
INJECTED #7
CTCGGACGGTTTTACAGGTGGACACCGAACTGTCAGGCTCGCCAGCTGAACCACCGGTTTTCCAACTCTATGAGTACAAAAATGGAGCAGCCGTTTTACCACGACGACTCGTTTCTGTTGGGTTACGGTCACAACGACGCGGCTCTACACGACTACAAACTCCAGAAACCGGGCATGAACTTGAACGTGACCGAGCCGCCCTATCGGAACCTCAAATCGG , WT									3722	99.0684
CTCGGACGGTTTTACAGGTGGACACCGAACTGTCAGGCTCGCCAGCTGAACCACCGGTTTTCCAACTCTATGAGTACAAAAATGGAGCAGCCGTTTTACCACGACGACTCGTTTCTGTTGGGTTACGGTCACAACGACGCGGCTCTACACGACTACAAACCCCAGAAACCGGGCATGAACTTGAACGTGACCGAGCCGCCCTATCGGAACCTCAAATCGG , 4									4	0.106468
CTCGGACGGTTTTACAGGTGGACACCGAACTGTCAGGCTCGCCAGCTGAACCACCGGTTTTCCAACTCTATGAGTACAAAAATGGAGCAGCCGTTTTACCACGACGACTCGTTTCTGTTGGGTTACGGTCACAACGACGCGGCTCTACACGACTACAAACTCCAGAAACCGGGCATGAACTTGAACGTGGCCGAGCCGCCCTATCGGAACCTCAAATCGG , 4									4	0.106468
CTCGGACGGTTTTACAGGTGGACACCGAACTGTCAGGCTCGCCAGCTGAATCACCGGTTTTCCAACTCTATGAGTACAAAAATGGAGCAGCCGTTTTACCACGACGACTCGTTTCTGTTGGGTTACGGTCACAACGACGCGGCTCTACACGACTACAAACTCCAGAAACCGGGCATGAACTTGAACGTGACCGAGCCGCCCTATCGGAACCTCAAATCGG , 3									3	0.0798509
CTCGGACGGTTTTACAGGTGGACACCGAACTGTCAGGCTCGCCAGCTGAACCACCGGTTTTCCAACTCTATGAGTACAAAAATGGAGCAGCCGTTTTACCACGACGACTCGTTTCTGTTGGGTTACGGTCACAACGACGCGGCTCTACACGACTACAAACTCCAGAAACCGGACATGAACTTGAACGTGACCGAGCCGCCCTATCGGAACCTCAAATCGG , 3									3	0.0798509
CTCGGACGGTTTTACAGGTGGACACCGAACTGTCAGGCTCGCCAGCTGAACCACCGGTTTTCCAACTCTATGAGTACAAAAATGGAGCAGCCGTTTTACCACGACGACTCGTCTCTGTTGGGTTACGGTCACAACGACGCGGCTCTACACGACTACAAACTCCAGAAACCGGGCATGAACTTGAACGTGACCGAGCCGCCCTATCGGAACCTCAAATCGG , 3									3	0.0798509
CTCGGACGGTTTTACAGGTGGACACCGAACTGTCAGGCTCGCCAGCTGAACCACCGGTTTTCCAACTCTATGAGTACAAAAATGGAGCAGCCGTTTTACCACGACGACTCGTTTCTGTTGGGTTACGGTCACAACGACGCGGCTCTACACGACTACAAACTCCAGAAACCGGGCACGAACTTGAACGTGACCGAGCCGCCCTATCGGAACCTCAAATCGG , 3									3	0.0798509
CTCGGACGGTTTTACAGGTGGACACCGAACTTTCAGGCTCGCCAGCTGAACCACCGGTTTTCCAACTCTATGAGTACAAAAATGGAGCAGCCGTTTTACCACGACGACTCGTTTCTGTTGGGTTACGGTCACAACGACGCGGCTCTACACGACTACAAACTCCAGAAACCGGGCATGAACTTGAACGTGACCGAGCCGCCCTATCGGAACCTCAAATCGG , 3									3	0.0798509
CTCGGACGGTTTTACAGGTGGACACCGAACTGTCAGGCTCGCCAGCTGAACCACCGGTTTTCCAACTCTATGAGTACAAAAATGGAGCAGCCGTTTTACCACGACGACTCGTTTCTGCTGGGTTACGGTCACAACGACGCGGCTCTACACGACTACAAACTCCAGAAACCGGGCATGAACTTGAACGTGACCGAGCCGCCCTATCGGAACCTCAAATCGG , 3									3	0.0798509
CTCGGACGGTTTTACAGGTGGACACCGAACTGTCAGGCTCGCCAGCTGAACCACCGGTTTTCCAACTCTATGGGTACAAAAATGGAGCAGCCGTTTTACCACGACGACTCGTTTCTGTTGGGTTACGGTCACAACGACGCGGCTCTACACGACTACAAACTCCAGAAACCGGGCATGAACTTGAACGTGACCGAGCCGCCCTATCGGAACCTCAAATCGG , 3									3	0.0798509
CTCGGACGGTTTTACAGGTGGACACCGAGCTGTCAGGCTCGCCAGCTGAACCACCGGTTTTCCAACTCTATGAGTACAAAAATGGAGCAGCCGTTTTACCACGACGACTCGTTTCTGTTGGGTTACGGTCACAACGACGCGGCTCTACACGACTACAAACTCCAGAAACCGGGCATGAACTTGAACGTGACCGAGCCGCCCTATCGGAACCTCAAATCGG , 3									3	0.0798509
CTCGGACGGTTTTACAGGTGGACACCGAACTGTCAGGCTCCCCAGCTGAACCACCGGTTTTCCAACTCTATGAGTACAAAAATGGAGCAGCCGTTTTACCACGACGACTCGTTTCTGTTGGGTTACGGTCACAACGACGCGGCTCTACACGACTACAAACTCCAGAAACCGGGCATGAACTTGAACGTGACCGAGCCGCCCTATCGGAACCTCAAATCGG , 3									3	0.0798509
CTGGTGGGTGGACAGAGAGCGAGGCGTCTTTCAGTTCTCCTCCAAACACAAGGAGACACTCGCCAGCCGAGTGGGGCCAGCAAAAGGGCAACCGCAAGAGAATGACCTACCAAAAGATGGCAAGAGCCCTCCGCAACTACGGCAAGACCGG , 17
INJECTED #8
CTCGGACGGTTTTACAGGTGGACACCGAACTGTCAGGCTCGCCAGCTGAACCACCGGTTTTCCAACTCTATGAGTACAAAAATGGAGCAGCCGTTTTACCACGACGACTCGTTTCTGTTGGGTTACGGTCACAACGACGCGGCTCTACACGACTACAAACTCCAGAAACCGGGCATGAACTTGAACGTGACCGAGCCGCCCTATCGGAACCTCAAATCGG , WT									0	0
CTCGGACGGTTTTACAGGTGGACGCTGAACTGTCAGGCTCGCCAGCTGAACCACCGGTTTTCAAACTCTATGAGTACAAAAATGGAGCAGCCGTTTTACCACGACGACTCGTTTCTGTTGGGTTACGGCTCTACACGACTACAAACTCCAGAAACCGGGCATGAACTTGAACGTGACCGAGCCGCCCTATCGGAGCCTCAAATCGG , 1593									1593	39.2075
CTCGGACGGTTTTACAGGTGGACACCGAACTGTCAGGCTCGCCAGCTGAACCACCGGTTTTCCAACTCTATGAGTACAAAAATGGAGCAGCCGTTTTACCACGACGACTCGTTTCTGTTGGGTTACGGTCACAACGCGGCTCTACACGACTACAAACTCCAGAAACCGGGCATGAACTTGAACGTGACCGAGCCGCCCTATCGGAACCTCAAATCGG , 1558									1558	38.346
CTCGGACGGTTTTACAGGTGGACACCGAACTGTCAGGCTCGCCAGCTGAACCACCGGTTTTCCAACTCTATGAGTACAAAAATGGAGCAGCCGTTTTACCACGACGACTCGTTTCTGTTGGGTTACGGTCACTAACCGACTACACTCTACACGACTACAAACTCCAGAAACCGGGCATGAACTTGAACGTGACCGAGCCGCCCTATCGGAACCTCAAATCGG , 382									382	9.40192
CTCGGACGGTTTTACAGGTGGACACCGAACTGTCAGGCTCGCCAGCTGAACCACCGGTTTTCCAACTCTATGAGTACAAAAATGGAGCAGCCGTTTTACCACGACGACTCGTTTCTGTTGGGTTACGGTCGCGGCTCTACACGACTACAAACTCCAGAAACCGGGCATGAACTTGAACGTGACCGAGCCGCCCTATCGGAACCTCAAATCGG , 160									160	3.93798
CTCGGACGGTTTTACAGGTGGACGCTGAACTGTCAGGCTCGCCAGCTGAACCACCGGTTTTCAAACTCTATGAGTACAAAAATGGAGCAGCCGTTTTACCACGACGACTCGTTTCTGTTGGGTTACGGCTCTACACGACTACAAACTCCAGAAACCGGGCATGAACTTGAACGTGACCGAGCCGCCCTATCGGAACCTCAAATCGG , 116									116	2.85503
CTCGGACGGTTTTACAGGTGGACACCGAACTGTCAGGCTCGCCAGCTGAACCACCGGTTTTCCAACTCTATGAGTACAAAAATGGAGCAGCCGTTTTACCACGACGACTCGTTTCTGTTGGGTTACGGTCACAACGCGGCTCTACACGACTACAAACTCCAGAAACCGGGCATGAACTTGAACGTGACCGAGCCGCCCTATCGGAGCCTCAAATCGG , 61									61	1.50135
CTCGGACGGTTTTACAGGTGGACACCGAACTGTCAGGCTCGCCAGCTGAACCACCGGTTTTCCAACTCTATGAGTACAAAAATGGAGCAGCCGTTTTACCACGACGACTCGTTTCTGTTGGGTTACGGCTCTACACGACTACAAACTCCAGAAACCGGGCATGAACTTGAACGTGACCGAGCCGCCCTATCGGAGCCTCAAATCGG , 47									47	1.15678
CTCGGACGGTTTTACAGGTGGACGCTGAACTGTCAGGCTCGCCAGCTGAACCACCGGTTTTCAAACTCTATGAGTACAAAAATGGAGCAGCCGTTTTACCACGACGACTCGTTTCTGTTGGGTTACGGTCACAACGCGGCTCTACACGACTACAAACTCCAGAAACCGGGCATGAACTTGAACGTGACCGAGCCGCCCTATCGGAACCTCAAATCGG , 46									46	1.13217
CTCGGACGGTTTTACAGGTGGACACCGAACTGTCAGGCTCGCCAGCTGAACCACCGGTTTTCAAACTCTATGAGTACAAAAATGGAGCAGCCGTTTTACCACGACGACTCGTTTCTGTTGGGTTACGGCTCTACACGACTACAAACTCCAGAAACCGGGCATGAACTTGAACGTGACCGAGCCGCCCTATCGGAGCCTCAAATCGG , 43									43	1.05833
CTCGGACGGTTTTACAGGTGGACGCTGAACTGTCAGGCTCGCCAGCTGAACCACCGGTTTTCCAACTCTATGAGTACAAAAATGGAGCAGCCGTTTTACCACGACGACTCGTTTCTGTTGGGTTACGGTCACAACGCGGCTCTACACGACTACAAACTCCAGAAACCGGGCATGAACTTGAACGTGACCGAGCCGCCCTATCGGAACCTCAAATCGG , 29									29	0.713758
CTCGGACGGTTTTACAGGTGGACACCGAACTGTCAGGCTCGCCAGCTGAACCACCGGTTTTCCAACTCTATGAGTACAAAAATGGAGCAGCCGTTTTACCACGACGACTCGTTTCTGTTGGGTTACGGTCACTAACCGACTACACTCTACACGACTACAAACTCCAGAAACCGGGCATGAACTTGAACGTGACCGAGCCGCCCTATCGGAGCCTCAAATCGG , 18									18	0.443022
CTCGGACGGTTTTACAGGTGGACGCTGAACTGTCAGGCTCGCCAGCTGAACCACCGGTTTTCAAACTCTATGAGTACAAAAATGGAGCAGCCGTTTTACCACGACGACTCGTTTCTGTTGGGTTACGGTCGCGGCTCTACACGACTACAAACTCCAGAAACCGGGCATGAACTTGAACGTGACCGAGCCGCCCTATCGGAACCTCAAATCGG , 10									10	0.246124
